# Supplementary material
Source: publisher figshare collection journal article supplement (https://frontiersin.figshare.com/ndownloader/files/11821907)
Supplement: Supplementary file 1 [file 11821907]

Supplementary Material

Distinct nitrogen provisioning from organic amendments in soil as influenced by farming system and water regime

Martina Lori*, Sarah Symanczik, Paul Mäder, Norah Efosa, Sebastian Jaenicke, Franz Buegger, Simon Tresch, Alexander Goesmann, Andreas Gattinger

*** Correspondence:** Martina Lori: martina.lori@fibl.org

**SI Table 4. Overview of biochemical and gene abundance data after 56 days of incubation (experiment A**). Δ=net flux between start and end of incubation (56 days , Ntot=total nitrogen, Nmin=mineral nitrogen, Nmic=microbial biomass nitrogen, DON=dissolved organic nitrogen, Nlabile= labile nitrogen (Nmin +Nmic +DON); FS=Farming system, WR=Water regime, DRY= 20% of the soils maximum water holding capacity (mWHC), WET= 80% of the soils mWHC; *apr=alkaline metallopeptidase, npr=neutral metallopeptidase, ureC=urease, amoAOB=bacterial ammonia-oxidase, amaoAOA=archaeal ammonia-oxidase*; n=4; p≤ *0.05, **0.01, ***0.001, n.s=non-significant, SE=standard error.

|  |  | **DRY** | | |  | **WET** | | |  |  |  |  |
| --- | --- | --- | --- | --- | --- | --- | --- | --- | --- | --- | --- | --- |
|  |  | **Organic** | **Conventional** |  |  | **Organic** | **Conventional** |  |  | **Two way ANOVA effect tests** | | |
|  |  | mean ± SE | | Contrast analysis |  | mean ± SE | | Contrast analysis |  | FS | WR | WRxFS |
| **ΔNmin** | mg kg-1 DW soil-1 | -28.4 ± 4.5 | -15.0 ± 18.6 | n.s |  | 100.8 ± 8.3 | 119.3 ± 16.1 | n.s |  | n.s | *** | n.s |
| **ΔNmic** | mg kg-1 DW soil-1 | 48.2 ± 5.6 | 52.9 ± 13.5 | n.s |  | -14.9 ± 6.1 | -11.1 ± 13.7 | n.s |  | n.s | *** | n.s |
| **ΔDON** | mg kg-1 DW soil-1 | -3.7 ± 0.7 | -4.75 ± 0.9 | n.s |  | -5.86 ± 0.9 | -15.6 ±0.8 | *** |  | *** | *** | *** |
| **ΔNlabile** | mg kg-1 DW soil-1 | 2.7 ± 5.7 | -18.8 ± 2.18 | * |  | 66.5 ± 7.9 | 40.5 ± 6.8 | * |  | ** | *** | n.s |
| **Cmic/Nmic** |  | 7.4 ± 0.01 | 6.8 ± 0.2 | n.s |  | 15.2 ± 0.7 | 43.4 ± 8.2 | *** |  | ** | *** | *** |
| ***apr*** | copy numbers g-1 DW soil-1 | 5.5E+06 ±6.2E+05 | 4.6E+06 ± 2.0E+05 | n.s |  | 7.6E+06 ± 1.1E+06 | 5.3E+06 ± 3.8E+05 | n.s |  | n.s | * | n.s |
| ***npr*** | copy numbers g-1 DW soil-1 | 7.3E+04 ± 7.4E+03 | 7.6E+04 ± 1.2E+04 | n.s |  | 1.2E+05 ± 2.2E+04 | 1.4E+05 ± 1.3E+04 | n.s |  | n.s | ** | n.s |
| ***ureC*** | copy numbers g-1 DW soil-1 | 1.1E+09 ± 1.4E+08 | 7.6E+08 ± 1.1E+08 | n.s |  | 1.0E+09 ± 1.5E+08 | 9.2E+08 ± 7.5E+07 | n.s |  | n.s | n.s | n.s |
| ***amoAOA*** | copy numbers g-1 DW soil-1 | 2.4E+06 ± 4.2E+05 | 1.5E+06 ± 1.6E+05 | n.s |  | 5.7E+06 ± 7.9E+05 | 3.2E+06 ± 3.4E+05 | ** |  | ** | *** | n.s |
| ***amoAOB*** | copy numbers g-1 DW soil-1 | 1.6E+05 ± 3.1E+04 | 2.3E+05 ± 4.1E+04 | n.s |  | 2.0E+05 ± 3.0E+04 | 2.6E+05 ± 5.0E+04 | n.s |  | n.s | n.s | n.s |
| **CO2 respiration** | mg CO2-C kg-1 dry soil produced within 56 d | 1468.4 ± 46.8 | 1421.2 ± 80.0 | n.s |  | 2340.8 ± 1000.0 | 2515.6 ± 65.0 | n.s. |  | n.s | *** | n.s. |
